# Supplementary material for: Microscopic solvation of NaBO2 in water: anion photoelectron spectroscopy and ab initio calculations
Source: Royal Society of Chemistry journal article supplement (doi:10.1039/c1cp20831d), 2011-01-01
Supplement: c1cp20831d.pdf [file c1cp20831d.pdf]

Supplementary materials for:

**Microscopic solvation of NaBO<sub>2</sub> in water: Anion  
photoelectron spectroscopy and *ab initio* calculations**

Yuan Feng, Min Cheng, Xiang-Yu Kong, Hong-Guang Xu, and Wei-Jun Zheng\*

*Beijing National Laboratory for Molecular Sciences, State Key Laboratory of  
Molecular Reaction Dynamics, Institute of Chemistry, Chinese Academy of sciences,  
Beijing 100190, China*

\* Corresponding author. E-mail: zhengwj@iccas.ac.cn, Tel: +86 10 62635054, Fax: +86

10 62563167

## Contents

**Figure S1:** Structures of the low-lying isomers of  $\text{NaBO}_2^-(\text{H}_2\text{O})_n^-$  ( $n=0-4$ ) clusters.

**Table S1:** Cartesian coordinates of the low-lying isomers of  $\text{NaBO}_2^-(\text{H}_2\text{O})_n^-$  ( $n=0-4$ ) clusters.

**Figure S2:** Structures of the low-lying isomers of neutral  $\text{NaBO}_2(\text{H}_2\text{O})_n$  ( $n=0-4$ ) clusters.

**Table S2:** Cartesian coordinates of the low-lying isomers of neutral  $\text{NaBO}_2(\text{H}_2\text{O})_n$  ( $n=0-4$ ) clusters.

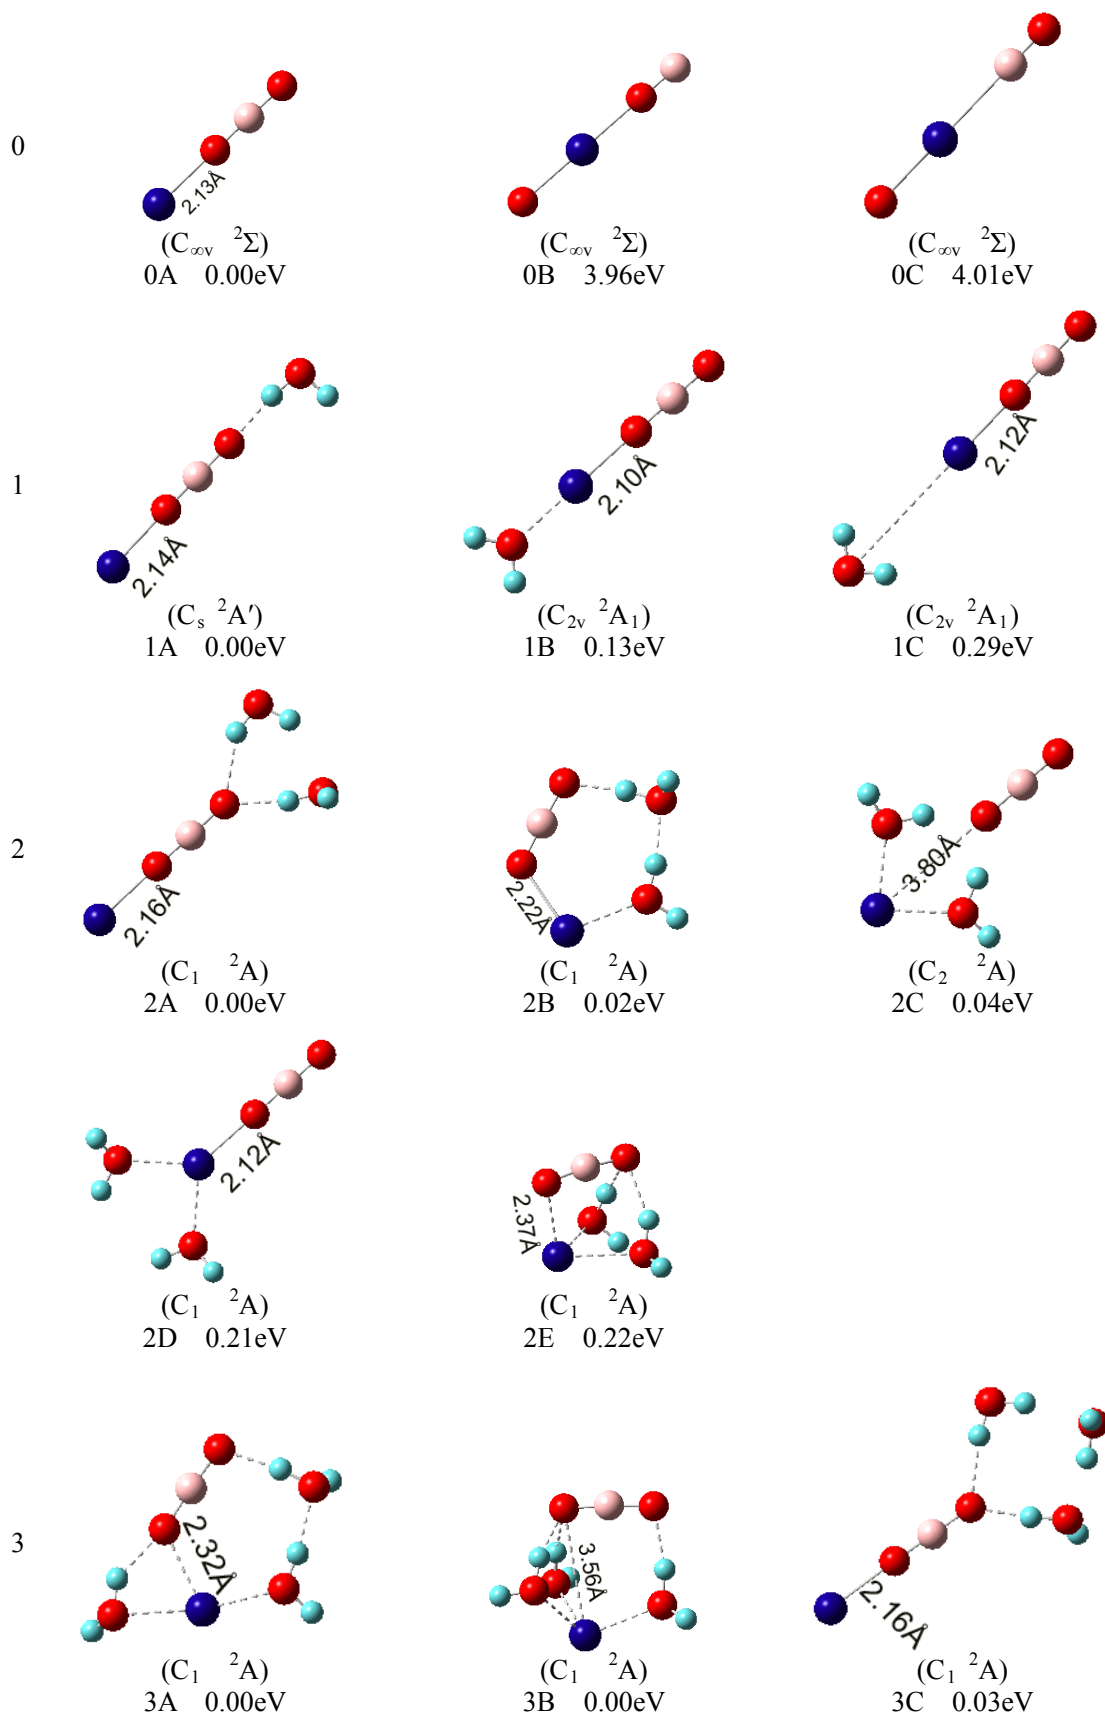

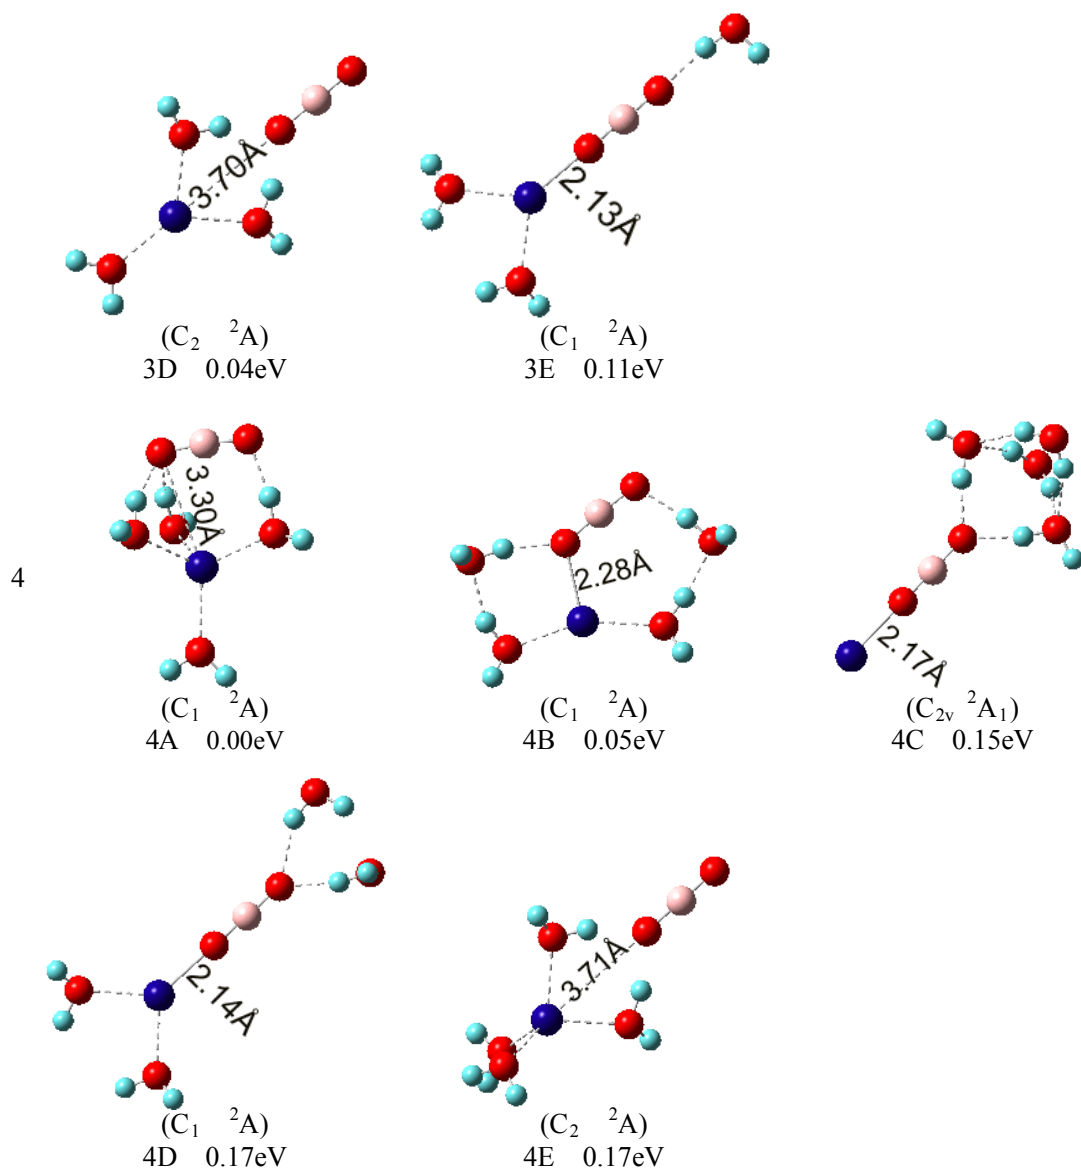

**Fig. S1** Optimized geometries of the typical low-lying isomers of  $\text{NaBO}_2^-(\text{H}_2\text{O})_n$  ( $n=0-4$ ).

**Table S1** Cartesian coordinates of the low-lying isomers of  $\text{NaBO}_2^-(\text{H}_2\text{O})_n$  ( $n=0-4$ ) clusters.

| $\text{NaBO}_2^-$ |            |            |             | $\text{NaBO}_2^-(\text{H}_2\text{O})$ |             |             |             |
|-------------------|------------|------------|-------------|---------------------------------------|-------------|-------------|-------------|
| <b>0A</b>         |            |            |             | <b>1A</b>                             |             |             |             |
| Na                | 0.00000000 | 0.00000000 | 2.22470200  | Na                                    | -2.73272500 | 2.08988600  | 0.00000000  |
| O                 | 0.00000000 | 0.00000000 | 0.09829900  | O                                     | -1.00968500 | 0.81845300  | 0.00000000  |
| B                 | 0.00000000 | 0.00000000 | -1.17444100 | B                                     | 0.00000000  | 0.05551400  | 0.00000000  |
| O                 | 0.00000000 | 0.00000000 | -2.42323900 | O                                     | 0.99547400  | -0.70373200 | 0.00000000  |
| <b>0B</b>         |            |            |             | H                                     | 2.44228100  | -1.71095600 | 0.00000000  |
| Na                | 0.00000000 | 0.00000000 | 0.52888600  | O                                     | 3.13820500  | -2.40672200 | 0.00000000  |
| O                 | 0.00000000 | 0.00000000 | 2.69061300  | H                                     | 2.62574800  | -3.21936100 | 0.00000000  |
| O                 | 0.00000000 | 0.00000000 | -1.62497300 | <b>1B</b>                             |             |             |             |
| B                 | 0.00000000 | 0.00000000 | -2.86857400 | Na                                    | -1.12100500 | -0.00119600 | -0.03038400 |
| <b>0C</b>         |            |            |             | O                                     | 0.97908300  | -0.00020300 | -0.00797200 |
| Na                | 0.00000000 | 0.00000000 | 0.81246800  | B                                     | 2.25320700  | 0.00016500  | 0.00415500  |
| O                 | 0.00000000 | 0.00000000 | 2.98425100  | O                                     | 3.49972200  | 0.00061200  | 0.01619100  |
| B                 | 0.00000000 | 0.00000000 | -1.76938400 | O                                     | -3.35852900 | 0.00104300  | 0.03510900  |
| O                 | 0.00000000 | 0.00000000 | -2.99553100 | H                                     | -3.94776300 | -0.77778700 | -0.01608500 |
|                   |            |            |             | H                                     | -3.94942300 | 0.77850700  | -0.01708200 |
|                   |            |            |             | <b>1C</b>                             |             |             |             |
|                   |            |            |             | Na                                    | 0.00000000  | 0.00000000  | 0.69581800  |
|                   |            |            |             | O                                     | 0.00000000  | 0.00000000  | -1.42430200 |
|                   |            |            |             | B                                     | 0.00000000  | 0.00000000  | -2.69742700 |
|                   |            |            |             | O                                     | 0.00000000  | 0.00000000  | -3.94558800 |
|                   |            |            |             | H                                     | 0.00000000  | 0.75147700  | 4.38996000  |
|                   |            |            |             | O                                     | 0.00000000  | 0.00000000  | 5.00154200  |
|                   |            |            |             | H                                     | 0.00000000  | -0.75147700 | 4.38996000  |

**NaBO<sub>2</sub><sup>-</sup>(H<sub>2</sub>O)<sub>2</sub>**

| <b>2A</b> |             |             |             | <b>2C</b> |             |             |             |
|-----------|-------------|-------------|-------------|-----------|-------------|-------------|-------------|
| Na        | 4.06180600  | -0.00586700 | 0.01773600  | Na        | 0.00000000  | 0.00000000  | 2.72716700  |
| O         | 1.90644700  | -0.04316000 | -0.01322700 | O         | 0.00000000  | 0.00000000  | -1.07222500 |
| B         | 0.64712500  | -0.05330400 | -0.02005300 | B         | 0.00000000  | 0.00000000  | -2.35114100 |
| O         | -0.61150500 | -0.06314100 | -0.02100300 | O         | 0.00000000  | 0.00000000  | -3.59435500 |
| O         | -3.14095900 | -1.49851800 | 0.02917600  | O         | 0.00000000  | 1.56372800  | 1.05598400  |
| H         | -2.18498800 | -1.32085500 | 0.03418800  | O         | 0.00000000  | -1.56372800 | 1.05598400  |
| H         | -3.49349700 | -0.60308300 | -0.06674800 | H         | -0.38127100 | -2.43565600 | 0.92757100  |
| H         | -1.97333100 | 1.03970900  | -0.13668300 | H         | -0.00149200 | -1.10841700 | 0.16931600  |
| O         | -2.83307500 | 1.51933500  | -0.08532900 | H         | 0.38127100  | 2.43565600  | 0.92757100  |
| H         | -2.83093100 | 1.89916100  | 0.79748100  | H         | 0.00149200  | 1.10841700  | 0.16931600  |

  

| <b>2B</b> |             |             |             | <b>2D</b> |             |             |             |
|-----------|-------------|-------------|-------------|-----------|-------------|-------------|-------------|
| Na        | 2.16409900  | 0.12660700  | 0.02031800  | Na        | 0.69775100  | -0.01050100 | -0.01660000 |
| O         | 0.84768600  | -1.66108200 | 0.04746600  | O         | -1.41899600 | -0.00820400 | 0.01344300  |
| B         | -0.40638900 | -1.55291700 | -0.01364800 | B         | -2.69177300 | -0.00811500 | 0.00392600  |
| O         | -1.65474400 | -1.38535900 | -0.07174300 | O         | -3.93967700 | -0.00763200 | -0.00531200 |
| O         | 0.64270400  | 1.83974600  | -0.01694200 | O         | 2.30790900  | 1.62869800  | -0.01647800 |
| H         | -0.33637100 | 1.71938900  | -0.04246800 | O         | 2.36034700  | -1.62541100 | -0.05207500 |
| H         | 0.83052100  | 2.73747500  | -0.31268700 | H         | 3.23175600  | 1.31720300  | 0.04576400  |
| O         | -2.05857500 | 1.24139600  | -0.02429400 | H         | 2.33432700  | 2.56698400  | 0.22446500  |
| H         | -1.99492100 | 0.24494100  | -0.09832500 | H         | 3.25904500  | -1.26978600 | -0.19599900 |
| H         | -2.48894800 | 1.39248600  | 0.82232700  | H         | 2.48180800  | -2.35791200 | 0.57212000  |

  

| <b>2E</b> |             |             |             |
|-----------|-------------|-------------|-------------|
| Na        | 0.72980700  | 1.41398100  | -0.15757800 |
| O         | -1.19601300 | -1.40812000 | 0.11126600  |
| B         | -1.49583200 | -0.18078900 | 0.03689900  |
| O         | -1.60946400 | 1.06736800  | -0.04546500 |
| O         | 1.14638000  | -0.34154000 | 1.57340200  |
| O         | 1.11743000  | -0.69408600 | -1.33325800 |
| H         | 1.20521400  | -0.78869500 | -2.28898900 |
| H         | 0.31514400  | -1.19225100 | -1.06020000 |
| H         | 1.88507900  | -0.75795400 | 1.11078200  |
| H         | 0.37918300  | -0.89992200 | 1.33970400  |
| H         | -2.83093100 | 1.89916100  | 0.79748100  |

**NaBO<sub>2</sub>(H<sub>2</sub>O)<sub>3</sub>**

| <b>3A</b> |             |             |             | <b>3C</b> |             |             |             |
|-----------|-------------|-------------|-------------|-----------|-------------|-------------|-------------|
| Na        | -1.28384600 | 1.06595200  | 0.25591800  | Na        | -4.69618600 | -0.01922100 | 0.16533500  |
| O         | -0.79861000 | -1.20181100 | 0.16778800  | O         | -2.54034200 | 0.03012600  | 0.03171600  |
| B         | 0.39683300  | -1.59272300 | 0.03596700  | B         | -1.28658800 | 0.02917500  | -0.05758700 |
| O         | 1.60315700  | -1.91621500 | -0.09069400 | O         | -0.02900800 | 0.02345200  | -0.15251200 |
| O         | 0.72786800  | 2.03971100  | -0.19055200 | O         | 1.89822500  | -1.79576600 | -0.21099400 |
| O         | -3.23252800 | -0.18909300 | -0.29013700 | H         | 1.13341500  | -1.15894100 | -0.16375700 |
| H         | -3.91314400 | -0.31316700 | 0.38108900  | H         | 1.86588200  | -2.15137000 | -1.10330900 |
| H         | -2.56923200 | -0.89843400 | -0.15466500 | H         | 1.30769700  | 1.49022800  | -0.23225100 |
| H         | 1.57155100  | 1.52887000  | -0.16555000 | O         | 2.08946300  | 2.06865400  | -0.25228200 |
| H         | 0.93802500  | 2.93997300  | 0.08644900  | H         | 2.82956500  | 1.46049500  | -0.10588000 |
| O         | 2.96907600  | 0.40184700  | -0.07065200 | O         | 4.02769500  | -0.15262200 | 0.40179400  |
| H         | 3.40761800  | 0.40516300  | 0.78589400  | H         | 4.06359000  | -0.16724100 | 1.36230700  |
| H         | 2.55161900  | -0.49977500 | -0.13418500 | H         | 3.32256400  | -0.79837100 | 0.17036900  |
| <b>3B</b> |             |             |             | <b>3D</b> |             |             |             |
| Na        | -1.49956500 | 1.03544100  | -0.01533500 | Na        | 0.00000000  | 0.00000000  | 1.85171900  |
| O         | 0.74253400  | -1.72533400 | 0.01289200  | O         | 0.00000000  | 0.00000000  | -1.84665300 |
| B         | 1.64982000  | -0.83843200 | -0.02779200 | B         | 0.00000000  | 0.00000000  | -3.1270530  |
| O         | 2.47213600  | 0.10641300  | -0.05606700 | O         | 0.00000000  | 0.00000000  | -4.36865400 |
| O         | -1.29218700 | -0.73504800 | -1.55637900 | O         | 0.00000000  | 1.58077600  | 0.24444200  |
| O         | -1.21788800 | -0.64067800 | 1.60482900  | O         | 0.00000000  | -1.58077600 | 0.24444200  |
| O         | 0.56583500  | 2.08676200  | -0.00851800 | O         | 0.00000000  | 0.00000000  | 4.09857300  |
| H         | -0.97784200 | -0.52395000 | 2.52945900  | H         | -0.23642700 | -2.49888200 | 0.09774400  |
| H         | -0.49905300 | -1.17582100 | 1.19178000  | H         | 0.00041400  | -1.12402600 | -0.64395700 |
| H         | -2.02085700 | -1.34513300 | -1.71137100 | H         | 0.23642700  | 2.49888200  | 0.09774400  |
| H         | -0.57216300 | -1.26163800 | -1.13633300 | H         | -0.00041400 | 1.12402600  | -0.64395700 |
| H         | 0.79339200  | 2.87724600  | -0.50821200 | H         | -0.09796500 | 0.77022200  | 4.69079000  |
| H         | 1.35919400  | 1.49470000  | -0.03174100 | H         | 0.09796500  | -0.77022200 | 4.69079000  |
|           |             |             |             | <b>3E</b> |             |             |             |
|           |             |             |             | Na        | -1.77070400 | 0.00295100  | -0.01235000 |
|           |             |             |             | O         | 0.35754300  | -0.0320590  | 0.01651000  |
|           |             |             |             | B         | 1.62330100  | -0.0410400  | 0.00896700  |
|           |             |             |             | O         | 2.87407200  | -0.0446430  | 0.00321400  |
|           |             |             |             | O         | -3.40311500 | -1.6071930  | -0.02252700 |
|           |             |             |             | O         | -3.37721800 | 1.66563400  | -0.05521900 |
|           |             |             |             | H         | -4.28109400 | 1.32645800  | -0.21062800 |
|           |             |             |             | H         | -3.49143200 | 2.38724700  | 0.58341200  |
|           |             |             |             | H         | -4.31747700 | -1.26396800 | 0.01973000  |
|           |             |             |             | H         | -3.46280000 | -2.53660200 | 0.24609700  |
|           |             |             |             | O         | 5.61723000  | -0.04397500 | -0.00813400 |
|           |             |             |             | H         | 5.72591000  | 0.91054800  | -0.01509600 |
|           |             |             |             | H         | 4.64004400  | -0.15304900 | -0.00325200 |

| <b>NaBO<sub>2</sub>(H<sub>2</sub>O)<sub>4</sub></b> |             |             |             |           |             |             |             |
|-----------------------------------------------------|-------------|-------------|-------------|-----------|-------------|-------------|-------------|
| <b>4A</b>                                           |             |             |             | H         | 0.00000000  | -1.19377200 | -0.83610100 |
| Na                                                  | -1.26408200 | -0.07423400 | 0.07002400  | H         | 0.00000000  | -2.65858100 | -1.35563300 |
| O                                                   | 2.17753300  | -1.07338900 | -0.03550400 | O         | -1.97344500 | 0.00000000  | -3.08134100 |
| B                                                   | 2.41306800  | 0.17169300  | -0.11470700 | O         | 1.97344500  | 0.00000000  | -3.08134100 |
| O                                                   | 2.54872300  | 1.41484700  | -0.17869100 | H         | -1.46697800 | -0.75445000 | -2.74499100 |
| O                                                   | 0.04502300  | -1.16352400 | 1.70551500  | H         | -1.46697800 | 0.75445000  | -2.74499100 |
| O                                                   | -0.14469700 | 1.96357600  | 0.03097500  | H         | 1.46697800  | -0.75445000 | -2.74499100 |
| H                                                   | 0.27088800  | -0.76612600 | 2.55116700  | H         | 1.46697800  | 0.75445000  | -2.74499100 |
| H                                                   | 0.89665400  | -1.25880000 | 1.21766000  | <b>4D</b> |             |             |             |
| H                                                   | -0.44560500 | 2.77289300  | -0.39397300 | Na        | 2.45661200  | -0.01628600 | -0.02862800 |
| H                                                   | 0.83916600  | 1.93788300  | -0.05774900 | O         | 0.31691900  | -0.02661300 | -0.01411500 |
| O                                                   | -0.14504600 | -1.47882500 | -1.42844300 | B         | -0.94285100 | -0.03340000 | -0.02171700 |
| H                                                   | 0.77796800  | -1.46566200 | -1.08140900 | O         | -2.20002500 | -0.04212700 | -0.02312400 |
| H                                                   | -0.08309700 | -1.41367600 | -2.38552900 | O         | 4.06197900  | -1.62718400 | 0.30132000  |
| O                                                   | -3.51896000 | 0.25435300  | -0.04133200 | O         | 4.04479900  | 1.61573400  | -0.36700800 |
| H                                                   | -4.17002500 | -0.31161300 | -0.49178400 | O         | -4.72112900 | -1.45856300 | -0.40214300 |
| H                                                   | -3.94699300 | 1.12691000  | 0.02473200  | O         | -4.44842500 | 1.47094600  | 0.34432500  |
| <b>4B</b>                                           |             |             |             | H         | 4.97487500  | -1.28263300 | 0.23291700  |
| Na                                                  | 0.64879100  | 1.18557000  | 0.06267600  | H         | 4.11541500  | -2.36561400 | 0.92798200  |
| O                                                   | 0.40379700  | -1.07441500 | -0.07016600 | H         | -3.58197400 | 1.03711200  | 0.16863600  |
| B                                                   | -0.76381900 | -1.56389500 | -0.13914800 | H         | -4.46208000 | 1.57964800  | 1.29912800  |
| O                                                   | -1.94270700 | -1.98250800 | -0.20058500 | H         | -5.08414700 | -0.57563500 | -0.24743300 |
| O                                                   | -3.52809400 | 0.18598200  | 0.07218200  | H         | -3.76768900 | -1.28107500 | -0.33883400 |
| O                                                   | 2.90121500  | 1.28560400  | -0.27288500 | H         | 4.10443700  | 2.50663100  | 0.01279800  |
| O                                                   | -1.45793000 | 2.02292900  | -0.01171200 | H         | 4.95974400  | 1.27016400  | -0.34574200 |
| H                                                   | 3.21727400  | 0.36985400  | -0.10461800 | <b>4E</b> |             |             |             |
| H                                                   | 3.52507200  | 1.88855500  | 0.15082700  | Na        | 0.00000000  | 0.00000000  | 1.44678900  |
| H                                                   | -3.03507200 | -0.66361200 | -0.07808500 | O         | 0.00000000  | 0.00000000  | -2.26503000 |
| H                                                   | -3.94031600 | 0.08019300  | 0.93531600  | B         | 0.00000000  | 0.00000000  | -3.54481400 |
| H                                                   | -2.25687100 | 1.44464000  | 0.01553700  | O         | 0.00000000  | 0.00000000  | -4.78708000 |
| H                                                   | -1.72584400 | 2.89006500  | 0.31581300  | O         | 0.00000000  | 1.61682000  | -0.18397300 |
| O                                                   | 3.07208200  | -1.44220900 | 0.18470500  | O         | 1.66216500  | -0.01438800 | 3.08573300  |
| H                                                   | 3.21855300  | -1.72007600 | 1.09516800  | O         | -1.66216500 | 0.01438800  | 3.08573300  |
| H                                                   | 2.09269900  | -1.47447600 | 0.06403700  | H         | 2.17605500  | -0.80135300 | 3.32537600  |
| <b>4C</b>                                           |             |             |             | H         | 1.34940600  | 0.34255800  | 3.93748600  |
| Na                                                  | 0.00000000  | 0.00000000  | 5.09854500  | H         | -0.00913500 | 1.13229800  | -1.05557600 |
| O                                                   | 0.00000000  | 0.00000000  | 2.92779000  | H         | 0.55445800  | 2.39048100  | -0.30823300 |
| B                                                   | 0.00000000  | 0.00000000  | 1.67379100  | H         | -2.17605500 | 0.80135300  | 3.32537600  |
| O                                                   | 0.00000000  | 0.00000000  | 0.41050600  | H         | -1.34940600 | -0.34255800 | 3.93748600  |
| O                                                   | 0.00000000  | 1.74596200  | -1.65590200 | O         | 0.00000000  | -1.61682000 | -0.18397300 |
| O                                                   | 0.00000000  | -1.74596200 | -1.65590200 | H         | -0.55445800 | -2.39048100 | -0.30823300 |
| H                                                   | 0.00000000  | 2.65858100  | -1.35563300 | H         | 0.00913500  | -1.13229800 | -1.05557600 |
| H                                                   | 0.00000000  | 1.19377200  | -0.83610100 |           |             |             |             |



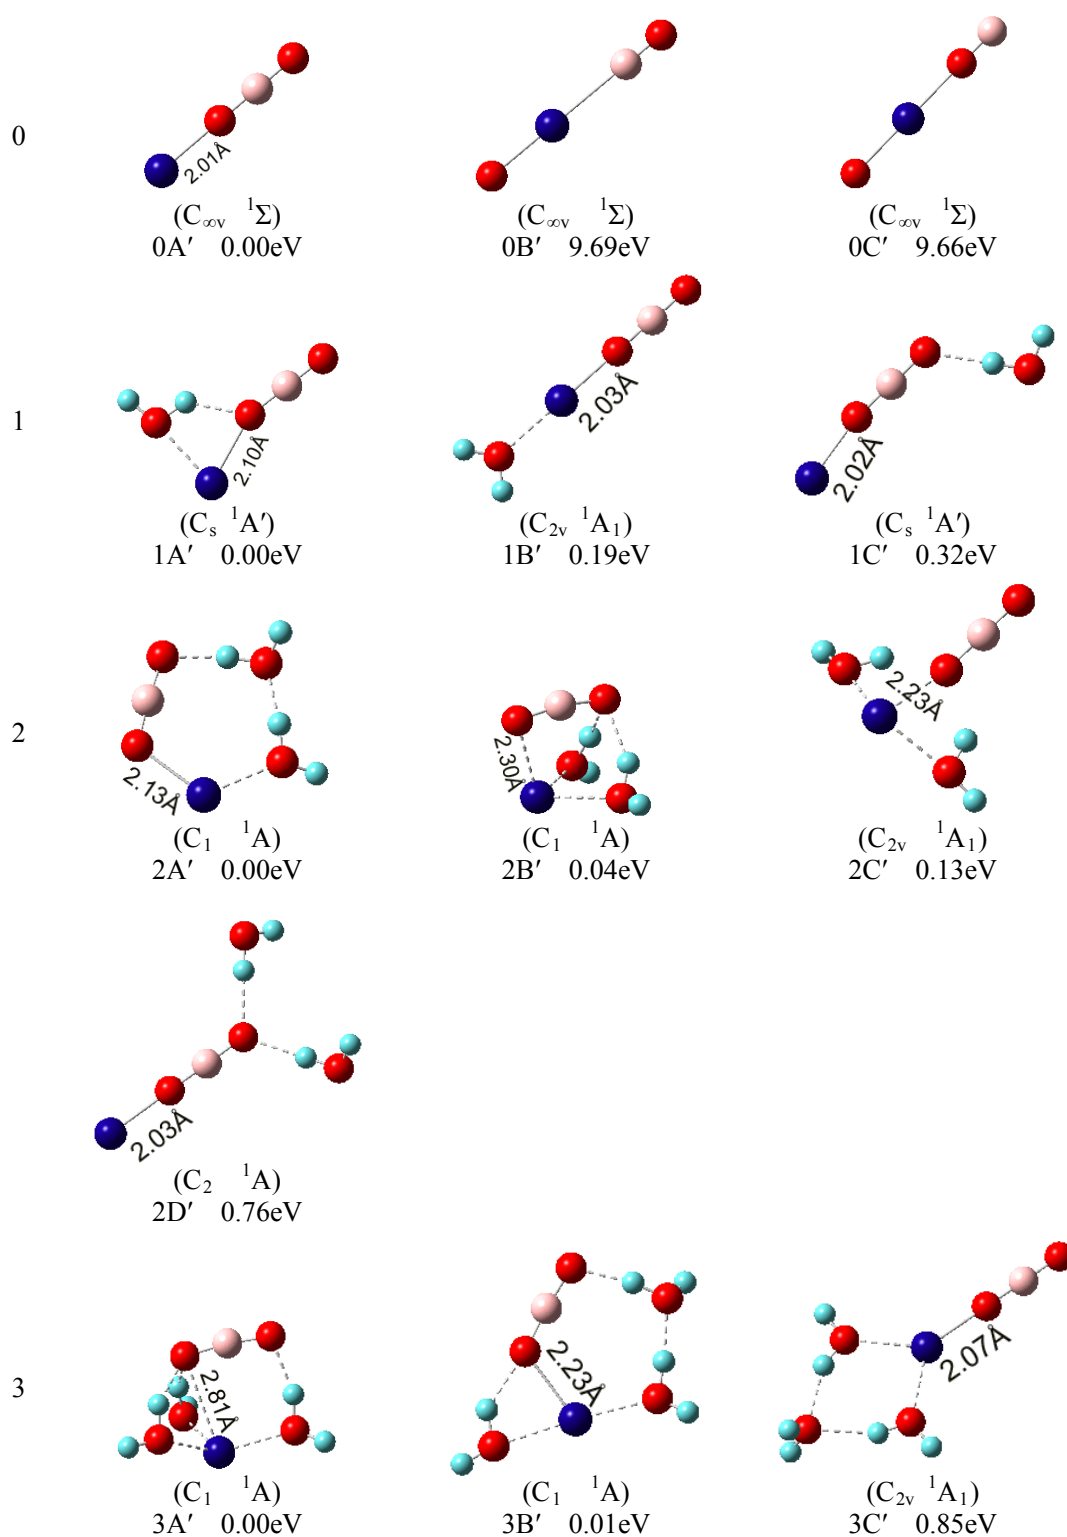

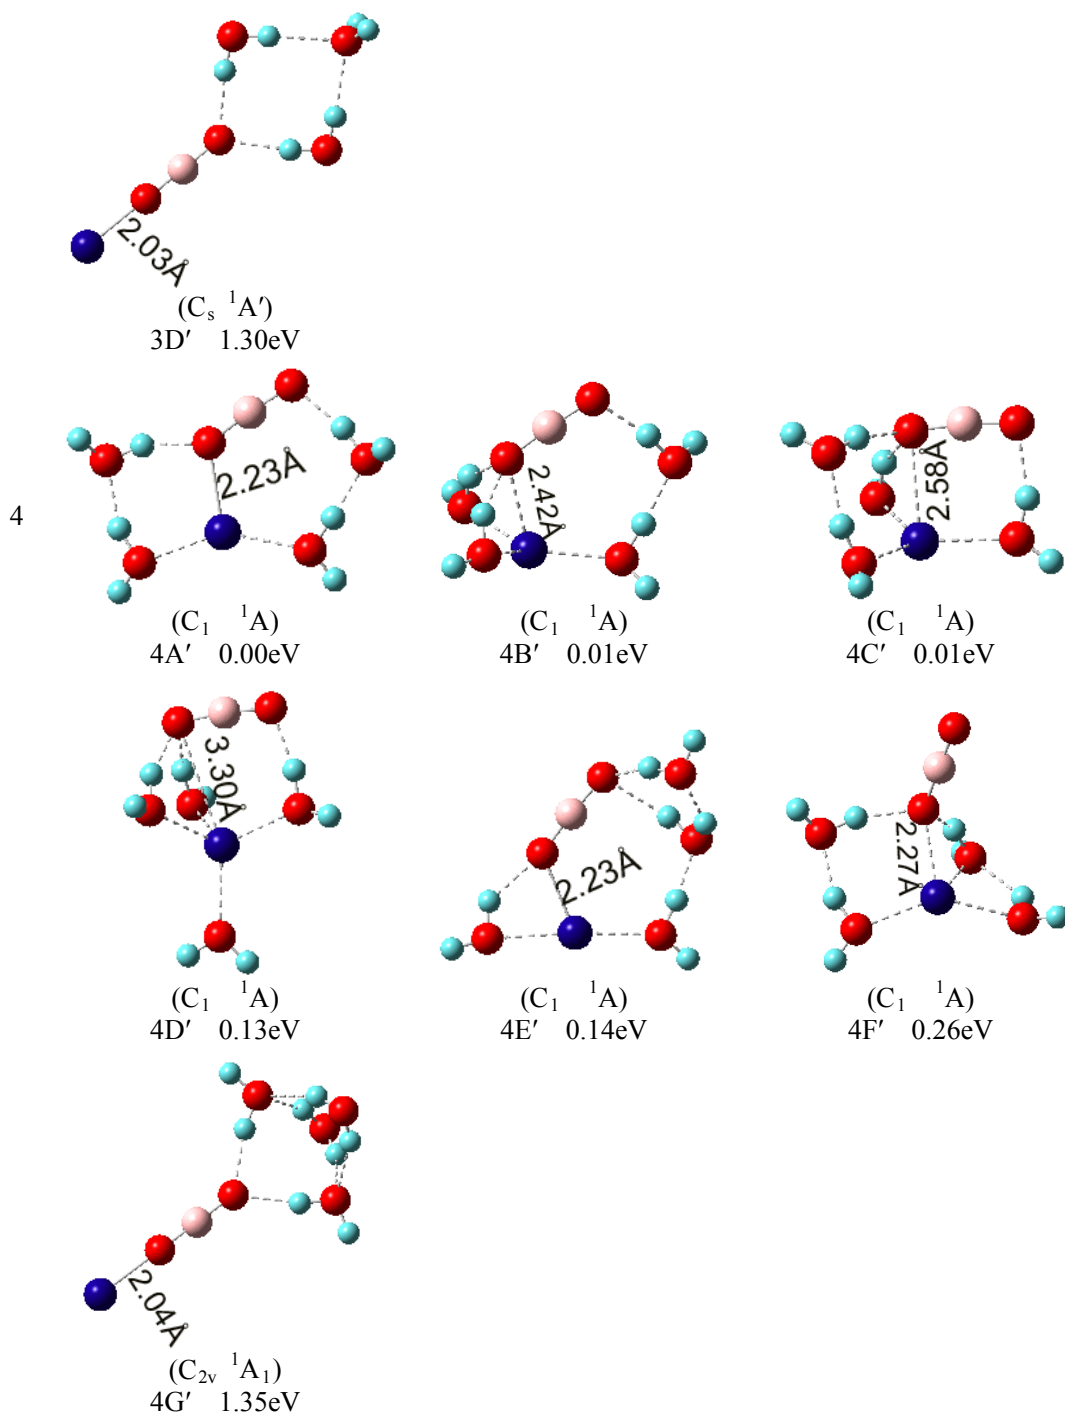

**Fig. S2** Optimized geometries of the typical low-lying isomers of NaBO<sub>2</sub>(H<sub>2</sub>O)<sub>n</sub> (n=0-4) neutrals.

**Table S2** Cartesian coordinates of the low-lying isomers of neutral  $\text{NaBO}_2(\text{H}_2\text{O})_n$   
 ( $n=0-4$ ) clusters.

| <b>NaBO<sub>2</sub></b> |            |            |             | <b>NaBO<sub>2</sub>(H<sub>2</sub>O)</b> |             |             |             |
|-------------------------|------------|------------|-------------|-----------------------------------------|-------------|-------------|-------------|
| <b>0A'</b>              |            |            |             | <b>1A'</b>                              |             |             |             |
| Na                      | 0.00000000 | 0.00000000 | 2.15149700  | Na                                      | -1.43743400 | -1.12060200 | 0.00124700  |
| O                       | 0.00000000 | 0.00000000 | 0.13816000  | O                                       | 0.39785700  | -0.09342900 | -0.00215100 |
| B                       | 0.00000000 | 0.00000000 | -1.14466300 | B                                       | 1.67700200  | 0.04847700  | -0.00062000 |
| O                       | 0.00000000 | 0.00000000 | -2.38105400 | O                                       | 2.90467500  | 0.17882200  | 0.00137300  |
| <b>0B'</b>              |            |            |             | <b>1B'</b>                              |             |             |             |
| Na                      | 0.00000000 | 0.00000000 | 0.81272600  | H                                       | -2.32282300 | 1.93432100  | 0.01874100  |
| O                       | 0.00000000 | 0.00000000 | 2.89085000  | O                                       | -1.96179200 | 1.04613300  | -0.00264100 |
| B                       | 0.00000000 | 0.00000000 | -1.72327900 | H                                       | -0.97633000 | 1.09771400  | -0.00200200 |
| O                       | 0.00000000 | 0.00000000 | -2.93129800 | <b>1C'</b>                              |             |             |             |
| <b>0C'</b>              |            |            |             | Na                                      | 0.00000000  | 0.00000000  | 1.07600500  |
| Na                      | 0.00000000 | 0.00000000 | 0.53316900  | O                                       | 0.00000000  | 0.00000000  | -0.95884400 |
| O                       | 0.00000000 | 0.00000000 | 2.64496300  | B                                       | 0.00000000  | 0.00000000  | -2.23976000 |
| O                       | 0.00000000 | 0.00000000 | -1.60736100 | O                                       | 0.00000000  | 0.00000000  | -3.47845400 |
| B                       | 0.00000000 | 0.00000000 | -2.83313500 | O                                       | 0.00000000  | 0.00000000  | 3.36983600  |
|                         |            |            |             | H                                       | 0.00000000  | 0.76840000  | 3.95122000  |
|                         |            |            |             | H                                       | 0.00000000  | -0.76840000 | 3.95122000  |
|                         |            |            |             | Na                                      | -3.07439000 | -0.54381300 | 0.00000000  |
|                         |            |            |             | O                                       | -1.23447800 | 0.29673100  | 0.00000000  |
|                         |            |            |             | B                                       | 0.00000000  | 0.61722100  | 0.00000000  |
|                         |            |            |             | O                                       | 1.20363900  | 0.92155200  | 0.00000000  |
|                         |            |            |             | H                                       | 2.63535500  | -0.20363100 | 0.00000000  |
|                         |            |            |             | O                                       | 3.40799300  | -0.80416900 | 0.00000000  |
|                         |            |            |             | H                                       | 4.16569700  | -0.21344100 | 0.00000000  |

**NaBO<sub>2</sub>(H<sub>2</sub>O)<sub>2</sub>**

| <b>2A'</b> |             |             |             | <b>2C'</b> |             |             |             |
|------------|-------------|-------------|-------------|------------|-------------|-------------|-------------|
| Na         | 1.30114300  | -1.40251700 | 0.04101000  | Na         | 0.79257600  | -1.45776200 | 0.00000000  |
| O          | -0.79892700 | -1.76007700 | 0.03485200  | O          | -0.13615900 | 0.56603100  | 0.00000000  |
| B          | -1.51838800 | -0.71996400 | -0.02211700 | B          | -0.16724100 | 1.85597700  | 0.00000000  |
| O          | -2.13101100 | 0.37241300  | -0.07605500 | O          | -0.19881200 | 3.08871400  | 0.00000000  |
| O          | 1.98480700  | 0.70531600  | -0.04029600 | O          | -0.19881200 | -1.20547600 | 1.99204400  |
| H          | 1.20354800  | 1.32968000  | 0.00161600  | O          | -0.19881200 | -1.20547600 | -1.99204400 |
| H          | 2.73022500  | 1.22462700  | -0.35130700 | H          | -0.56726800 | -1.25813600 | 2.87610500  |
| O          | -0.20827900 | 2.18772300  | 0.00540400  | H          | -0.44342100 | -0.33928800 | 1.59701800  |
| H          | -1.00928000 | 1.58853700  | -0.06011200 | H          | -0.44342100 | -0.33928800 | -1.59701800 |
| H          | 2.84166100  | -0.41785300 | 0.67803600  | H          | -0.56726800 | -1.25813600 | -2.87610500 |

  

| <b>2B'</b> |             |             |             | <b>2D'</b> |             |             |             |
|------------|-------------|-------------|-------------|------------|-------------|-------------|-------------|
| Na         | 0.64664600  | 0.14698200  | 1.26700100  | Na         | 0.00000000  | 0.00000000  | 3.71975200  |
| O          | -0.95719800 | -0.22146700 | -1.41729000 | O          | 0.00000000  | 0.00000000  | 1.68928900  |
| B          | -1.42756200 | -0.12363600 | -0.24668200 | B          | 0.00000000  | 0.00000000  | 0.42033100  |
| O          | -1.63392600 | -0.00162800 | 0.98570200  | O          | 0.00000000  | 0.00000000  | -0.82642600 |
| O          | 1.16692600  | -1.54657700 | -0.21172400 | O          | 0.00000000  | 2.29549600  | -2.48473500 |
| O          | 0.97914300  | 1.60821800  | -0.52246700 | H          | 0.03235100  | 1.50593300  | -1.91248300 |
| H          | 0.88578600  | 2.54353400  | -0.72236300 | H          | -0.63276500 | 2.06566100  | -3.17054900 |
| H          | 0.35761700  | 1.13352800  | -1.11921600 | H          | 0.63276500  | -2.06566100 | -3.17054900 |
| H          | 1.85224600  | -2.05947700 | -0.64621800 | O          | 0.00000000  | -2.29549600 | -2.48473500 |
| H          | 0.48949900  | -1.32457000 | -0.88956200 | H          | -0.03235100 | -1.50593300 | -1.91248300 |

| <b>NaBO<sub>2</sub>(H<sub>2</sub>O)<sub>3</sub></b> |             |             |             |
|-----------------------------------------------------|-------------|-------------|-------------|
| <b>3A'</b>                                          |             |             |             |
| Na                                                  | -0.63026400 | 1.20163000  | 0.02238100  |
| O                                                   | -0.23597500 | -1.58435700 | -0.04262600 |
| B                                                   | 1.01553600  | -1.36074300 | -0.05349300 |
| O                                                   | 2.20674800  | -0.98405700 | -0.05060700 |
| O                                                   | -1.59851200 | 0.03905700  | -1.67230800 |
| O                                                   | -1.48965800 | -0.02310900 | 1.74761400  |
| O                                                   | 1.58806500  | 1.62459100  | -0.00560000 |
| H                                                   | -1.48584200 | -0.16967700 | 2.69636200  |
| H                                                   | -1.13156000 | -0.83549500 | 1.31906700  |
| H                                                   | -2.33707200 | -0.18416700 | -2.24256400 |
| H                                                   | -1.23510200 | -0.79737800 | -1.29837200 |
| H                                                   | 2.25909400  | 2.26797800  | -0.24408200 |
| H                                                   | 2.02037300  | 0.72751500  | -0.02091600 |
| <b>3B'</b>                                          |             |             |             |
| <b>3C'</b>                                          |             |             |             |
| Na                                                  | 0.00000000  | 0.00000000  | 0.13889300  |
| O                                                   | 0.00000000  | 0.00000000  | 2.20581400  |
| B                                                   | 0.00000000  | 0.00000000  | 3.48369600  |
| O                                                   | 0.00000000  | 0.00000000  | 4.72555500  |
| O                                                   | 0.00000000  | 1.56016800  | -1.56163700 |
| O                                                   | 0.00000000  | -1.56016800 | -1.56163700 |
| O                                                   | 0.00000000  | 0.00000000  | -4.01855300 |
| H                                                   | 0.00000000  | -1.28671200 | -2.49089500 |
| H                                                   | 0.00000000  | -2.52140000 | -1.54053100 |
| H                                                   | 0.00000000  | 1.28671200  | -2.49089500 |
| H                                                   | 0.00000000  | 2.52140000  | -1.54053100 |
| H                                                   | 0.76989700  | 0.00000000  | -4.59989100 |
| H                                                   | -0.76989700 | 0.00000000  | -4.59989100 |
| <b>3D'</b>                                          |             |             |             |
| Na                                                  | 0.45903400  | 4.67000500  | 0.00000000  |
| O                                                   | 0.16455600  | 2.66561800  | 0.00000000  |
| B                                                   | 0.00993000  | 1.40314700  | 0.00000000  |
| O                                                   | -0.13993700 | 0.16828100  | 0.00000000  |
| O                                                   | -0.13993700 | -1.90063600 | 2.00869900  |
| H                                                   | -0.15172400 | -1.14234000 | 1.39944500  |
| H                                                   | -0.08530800 | -2.66490900 | 1.42203400  |
| H                                                   | -0.15172400 | -1.14234000 | -1.39944500 |
| O                                                   | -0.13993700 | -1.90063600 | -2.00869900 |
| H                                                   | -0.08530800 | -2.66490900 | -1.42203400 |
| O                                                   | -0.23031100 | -4.19082500 | 0.00000000  |
| H                                                   | -1.11686800 | -4.56738900 | 0.00000000  |
| H                                                   | 0.37643800  | -4.93832300 | 0.00000000  |

**NaBO<sub>2</sub>(H<sub>2</sub>O)<sub>4</sub>**

**4A'**

|    |             |             |             |   |             |             |             |
|----|-------------|-------------|-------------|---|-------------|-------------|-------------|
| Na | 0.57613800  | 1.10652800  | 0.03722900  | H | 0.12392800  | 0.43780000  | 1.99819800  |
| O  | 0.42289500  | -1.11436000 | 0.02161900  | H | 3.03214300  | 1.82110100  | -0.16772900 |
| B  | -0.74323200 | -1.61705000 | -0.03248300 | H | 1.50051000  | 1.52912200  | -0.27806000 |
| O  | -1.92485600 | -2.01591900 | -0.07796400 | H | -2.65752700 | -1.93233500 | -1.17799600 |
| O  | -3.40828400 | 0.20604600  | 0.01237800  | H | -2.36081200 | -0.42954300 | -0.82437100 |
| O  | 2.81622400  | 1.34670000  | 0.03923000  | O | 1.98796700  | -1.30359700 | -0.94831200 |
| O  | -1.46650800 | 2.04658200  | -0.03597900 | H | 2.31761200  | -0.37320300 | -0.92387400 |
| H  | 3.13496500  | 0.41036600  | 0.02122700  | H | 2.28424800  | -1.68179100 | -1.77979700 |

**4D'**

|    |             |             |             |
|----|-------------|-------------|-------------|
| Na | -1.04631100 | 0.14484300  | 0.00172900  |
| O  | 1.95352400  | -1.23157100 | -0.01123900 |
| B  | 2.30745400  | -0.01245800 | -0.00319800 |
| O  | 2.52593200  | 1.21970400  | 0.00802500  |
| O  | -0.20123000 | -1.27308600 | 1.61602800  |
| O  | 0.03273200  | 2.15544100  | -0.00102000 |
| H  | -0.05631300 | -1.29112800 | 2.56503300  |
| H  | 0.67527700  | -1.44026700 | 1.19092100  |
| H  | -0.05494700 | 3.07383500  | -0.26512600 |
| H  | 1.01061700  | 1.95486400  | 0.01255300  |
| O  | -0.22775200 | -1.30710500 | -1.59654500 |
| H  | 0.65762400  | -1.45680700 | -1.18195500 |
| H  | -0.10183100 | -1.36471300 | -2.54657500 |
| O  | -3.36752400 | 0.25473600  | -0.00093300 |
| H  | -3.91382000 | -0.53521600 | -0.06969100 |
| H  | -3.96990400 | 0.98350600  | 0.17728600  |

**4B'**

|    |             |             |             |
|----|-------------|-------------|-------------|
| Na | -1.04719500 | 1.00629800  | 0.07420400  |
| O  | -0.65072800 | -1.37347100 | -0.06978200 |
| B  | 0.58325700  | -1.68080200 | -0.13557800 |
| O  | 1.81022400  | -1.89795900 | -0.18351100 |
| O  | 0.90860800  | 2.13402200  | -0.05309300 |
| O  | -1.96120800 | -0.08722300 | 1.88459300  |
| O  | 3.01911700  | 0.48080100  | 0.03308500  |
| H  | -2.02235300 | -0.26128800 | 2.82647400  |
| H  | -1.57749100 | -0.88015400 | 1.45443700  |
| H  | 1.16072200  | 2.89664500  | -0.58042500 |
| H  | 1.72704500  | 1.57617100  | 0.01897300  |
| H  | 3.68200600  | 0.44675000  | 0.72820200  |
| H  | 2.68655900  | -0.44901300 | -0.08061400 |
| O  | -2.16480200 | 0.10060200  | -1.72298100 |
| H  | -1.77989600 | -0.74027200 | -1.39934300 |
| H  | -2.96341100 | -0.10827900 | -2.21255200 |

**4C'**

|    |             |             |             |
|----|-------------|-------------|-------------|
| Na | 0.04511900  | -1.21889200 | 0.22105300  |
| O  | -0.08005600 | 1.35079800  | 0.42853500  |
| B  | -1.22302600 | 1.42954700  | -0.12981000 |
| O  | -2.33980000 | 1.33882200  | -0.67529000 |
| O  | 2.37915000  | 1.34426000  | -0.68737500 |
| O  | 0.26010100  | -0.45553600 | 2.38092000  |
| O  | -2.02696100 | -1.35825600 | -0.73761200 |
| H  | -0.06447700 | -0.44301000 | 3.28416200  |

**4E'**

|    |             |             |             |
|----|-------------|-------------|-------------|
| Na | 1.81168100  | 0.78986900  | 0.20071000  |
| O  | 1.03658800  | -1.24587000 | -0.27521400 |
| B  | -0.18894900 | -1.46253400 | -0.50153300 |
| O  | -1.41777600 | -1.57753900 | -0.71867900 |
| O  | 3.53664800  | -0.67753900 | 0.36417900  |
| O  | 0.28333300  | 2.39359100  | -0.00905700 |
| O  | -3.20560100 | -0.59950600 | 1.12645900  |
| O  | -2.05344700 | 1.26888900  | -0.59934600 |
| H  | 4.34908000  | -1.14442900 | 0.56898700  |
| H  | 2.85023100  | -1.33294000 | 0.12473400  |
| H  | -2.61330700 | 0.97334300  | 0.14353000  |
| H  | -1.87268800 | 0.41992600  | -1.04099600 |
| H  | -2.65087500 | -1.15951300 | 0.54047200  |
| H  | -4.07531800 | -1.00797000 | 1.14543200  |
| H  | -0.62598200 | 2.03077100  | -0.20756000 |
| H  | 0.21716700  | 3.34871900  | -0.08147300 |

| <b>4F'</b> |             |             |             | <b>4G'</b> |             |             |             |
|------------|-------------|-------------|-------------|------------|-------------|-------------|-------------|
| Na         | 1.00150900  | 0.44677800  | -0.53996600 | Na         | 0.00000000  | 0.00000000  | 5.00161800  |
| O          | -0.90905400 | -0.55912000 | 0.17371400  | O          | 0.00000000  | 0.00000000  | 2.96339500  |
| B          | -1.67535400 | -1.49460400 | -0.28581200 | B          | 0.00000000  | 0.00000000  | 1.69622100  |
| O          | -2.40468000 | -2.38106300 | -0.73166200 | O          | 0.00000000  | 0.00000000  | 0.44874400  |
| O          | -1.84385500 | 1.94467700  | 0.64066200  | O          | 0.00000000  | 1.75157100  | -1.71707700 |
| O          | 2.76623300  | -1.01823500 | -0.59512100 | O          | 0.00000000  | -1.75157100 | -1.71707700 |
| O          | 0.40850000  | 2.61583900  | -0.63916700 | H          | 0.00000000  | 2.67931500  | -1.46649300 |
| H          | 2.54516500  | -1.33016400 | 0.30083300  | H          | 0.00000000  | 1.24013300  | -0.88231900 |
| H          | 3.12910100  | -1.76281500 | -1.08170000 | H          | 0.00000000  | -1.24013300 | -0.88231900 |
| H          | -1.66646900 | 0.97765600  | 0.54090200  | H          | 0.00000000  | -2.67931500 | -1.46649300 |
| H          | -2.77208800 | 2.07704800  | 0.42775200  | O          | -2.08063000 | 0.00000000  | -2.98167300 |
| H          | -0.47688100 | 2.61666600  | -0.20268500 | O          | 2.08063000  | 0.00000000  | -2.98167300 |
| H          | 0.74394400  | 3.51490200  | -0.62384600 | H          | -1.53076300 | -0.75552900 | -2.72959700 |
| O          | 1.26595700  | -0.83654600 | 1.65602800  | H          | -1.53076300 | 0.75552900  | -2.72959700 |
| H          | 1.26720900  | -0.75341400 | 2.61314200  | H          | 1.53076300  | -0.75552900 | -2.72959700 |
| H          | 0.32538000  | -0.90583800 | 1.35865600  | H          | 1.53076300  | 0.75552900  | -2.72959700 |
